# Supplementary material
Source: PubMed Central journal article supplement (PMC3978310)

### **Titles and legends to supplementary figures:**

#### **Figure S1. MS results of identified ISM binding partners in plasma membrane and mitochondria:**

(a-b) Identified ISM's binding partners in plasma membrane fraction. (a) MS result of clathrin heavy chain 1 (CHC1). (b) MS result of glucose-regulated protein of 78 kDa (GRP78). (c-g) Identified ISM's binding partners in mitochondria. (c) MS result of clathrin heavy chain 1 (CHC1). (d) MS result of glucose-regulated protein of 78 kDa (GRP78). (e) MS result of ISM. (f) MS result of ADP/ATP carrier 2 (AAC2). (g) MS result of ADP/ATP carrier 3 (AAC3). Bold red sequences represent the matched peptides by MALDI-TOF-TOF MS. Protein scores greater than 64 are significant ( $p < 0.05$ ).

**Figure S2. ISM inhibits angiogenesis through GRP78.** (a) Transient transfection of two different siRNAs effectively knocked down GRP78 expression in HUVECs. Equal amount of scramble siRNA was transfected as a control. (b) Knockdown of GRP78 expression by siRNAs diminished ISM-mediated EC adhesion.  $*P < 0.05$ ,  $n=3$ . Error bars denote SEM. (c-d) Knockdown of GRP78 expression by siRNAs compromised the anti-tube formation action of ISM.  $*P < 0.05$ ,  $n=3$ . Error bars denote SEM. (e) Knockdown of GRP78 expression by siRNAs reduced ISM-induced EC apoptosis.  $*P < 0.05$ ,  $n=3$ . Error bars denote SEM.

**Figure S3. GRP78 mediates ISM internalization.** (a) Anti-GRP78 antibody

reduced ISM internalization into HUVECs in a dose-dependent manner. **(b)** Internalized ISM-GRP78 complex mainly associated with CHC but not caveolin. ISM pre-treated HUVECs were washed to remove cell surface associated ISM and lysed in 1% Triton X-100 buffer. Triton-insoluble and -soluble fractions of HUVEC plasma membrane lysates were prepared by density centrifugation. Immunoblotting with antibodies against ISM,  $\alpha\beta 5$  integrin subunit  $\beta 5$  and GRP78 was used to analyze each fraction. Caveolin-1 and clathrin heavy chain (CHC) were used as markers for lipid-raft and non lipid-raft fraction. **(c)** Overexpression of GRP78 but not  $\alpha\beta 5$  integrin increased ISM internalization in LS174T cells.

**Figure S4. ISM selectively induces apoptosis in cells that express high level cell-surface GRP78 such as invasive cancer cells and activated ECs.**

**(a)** GRP78 level in the plasma membrane fraction of NIH3T3, SWISS3T3, HUVEC, HEK293T, B16F10, 4T1, LS174T, LS-LM6 and 786-O cells. Equal amount of plasma membrane proteins were loaded as shown in the coomassie blue stained gel. **(b-j)** ISM only induced significant apoptosis in cells exhibiting high level cell-surface GRP78. B16F10 (mouse melanoma), 4T1 (mouse breast carcinoma), 786-O (human renal carcinoma), LS-LM6 and LS174T (human colon cancer).  $**P < 0.01$ ,  $n = 3$ . Error bars denote SEM.

**Figure S5. Overexpression of GRP78 or  $\alpha\beta 5$  integrin conferred the pro-apoptotic function of ISM in LS174T cells.** **(a)** Increasing  $\alpha\beta 5$  integrin

expression level dose-dependently enhanced the pro-apoptotic effect of ISM on LS174T cells. **(b)** Simultaneous overexpression of GRP78 and  $\alpha\beta 5$  integrin generated more potent apoptotic response to ISM than overexpression of individual receptor in LS174T cells (compare to Fig. 3d and Fig. S5a respectively).

**Figure S6. ISM interacts with AAC2 in mitochondria and blocks ADP import from cytoplasm into mitochondria.** **(a)** ISM-induced morphology change of HUVECs is dependent on caspase activity. HUVECs were either treated by rISM or rISM plus Z-VAD-fmk as the pan-caspase inhibitor for 24 h. Mitochondria were labeled by red MitoTracker. Internalized rISM was detected by IF using antibody against his-tag. Nuclei were stained by DAPI. **(b)** Internalized ISM-GFP co-localized with AAC2. ISM-GFP expression plasmid was transiently transfected into HEK293T cells. Condition media was collected and applied to mCherry-AAC2 transfected HEK293T cells. ISM (green) co-localized with AAC2 (red) in mCherry-AAC2 expressing cells. Nuclei were stained with DAPI (blue). Quantitative measurement of Pearson's correlation coefficient ( $R_p$ ) between red and green fluorescent signals of the arrow-labeled cell was indicated in the far-right. **(c)** rISM treatment increased ADP level in cytosolic fraction of HUVECs independent of caspase activity. Z-VAD-fmk was used as pan-caspase inhibitor.  $**P < 0.01$ ,  $n=3$ . Error bars denote SEM. **(d)** rISM treatment decreased ADP level in mitochondrial fraction of HUVECs independent of caspase activity.  $**P < 0.01$ ,  $n=3$ . Error bars denote

SEM. (e) rISM treatment increased ADP concentration in whole cell lysates of HUVECs independent of caspase activity. \* $P < 0.05$ ,  $n = 3$ . Error bars denote SEM.

**Figure S7. GRP78 and  $\alpha\beta 5$  integrin present distinct distribution patterns in both B16F10 and 4T1 tumors.** Paraffin sections of B16F10 and 4T1 tumors from rISM-treated and control groups were double-stained for both GRP78 and  $\alpha\beta 5$  integrin through IF using anti-GRP78 (red) and anti- $\alpha\beta 5$  integrin (green). Nuclei were counter stained by DAPI (blue). Representative photos are shown. Quantitative measurements of Pearson's correlation coefficient ( $R\rho$ ) between red and green fluorescent labeled channels were indicated in the far-right.

**Figure S8. Systemically delivered rISM suppresses B16 melanoma growth in mice by inducing apoptosis of both cancer cells and cancer ECs. (a-d)**, ISM inhibits B16 melanoma growth in mice when delivered systematically. (a) B16F10 tumor growth curve in mice. X-axis represents the days after inoculation of  $5 \times 10^5$  tumor cells. Groups consisted of control mice receiving no treatment or 250  $\mu\text{g}$  rISM through tail vein injection every other day from day 0 (date of inoculation) to 14.  $N = 5$ . (b) Tumor weight at the end of the experiment (day 14). (c) Dissected tumors at the end of experiment. (d) rISM treated tumors showed a reduced vascularization compared to untreated control. (e) rISM suppressed tumor angiogenesis, proliferation and induced

apoptosis in B16F10 tumor. Paraffin sections of B16F10 tumors from control and treated groups with rISM were probed for microvascular density (MVD), tumor cell proliferation and apoptosis through IF using anti-CD31, anti-PCNA and TUNEL staining respectively. (f) Quantification of MVD, cell proliferation and apoptosis. Plots represent the mean of 3 fields per section, 3 sections per tumor and 2 tumors per group.  $**P<0.01$ . Error bars denote SEM. (g) ISM induces apoptosis of both cancer cells and cancer ECs in B16 melanoma. Double IF using anti-CD31 (red) and TUNEL (green) is shown. Nuclei were counter stained by DAPI (blue). Representative photos are shown. Apoptotic EC is indicated by white arrow.

## **Supplementary Materials and Methods**

### **DNA constructs**

The human AAC2 cDNA was amplified by primer pair (5' TCTCGAGATGACAGATGCCGCTGTG3' and 5' CTGGTACCGTTATGTGTA CTTCTTGATTC3') and cloned into pXJ40\_mCherry to obtain pXJ40\_mCherry-AAC2.

### **Syngeneic tumorigenesis assay**

B16F10 cells ( $5 \times 10^5$ ) were injected subcutaneously into the dorsal flank of 8-week old female C57BL/6J mice. Two groups of mice ( $n=5/\text{group}$ ) received either PBS or 250  $\mu\text{g}$  rISM by tail vein injection every other day from day 0 to the end point (day 14). Tumors were measured and processed as described.<sup>1</sup>

### **Tube formation assay**

EC tube formation assay was performed using *in vitro* angiogenesis assay kit (Millipore, Billerica, MA, USA) according to the manufacturers' instruction. The matrigel was plated into a  $\mu$ -Slide Angiogenesis chamber (ibidi, Martinsried, Germany) and kept at 37°C for 1 h to solidify. For studying the contribution of GRP78 to the anti-tube formation activity of ISM, HUVECs were pre-transfected by siRNAs of GRP78 for 48h. HUVECs transfected with scramble siRNA served as control. Then  $1 \times 10^4$  cells per sample in 50  $\mu\text{l}$  basal medium were treated with 1 $\mu\text{M}$  rISM for 30 min and plated onto the polymerized Matrigel and incubated at 37°C for 6–8 h before documenting the tubular structure formation using Zeiss Axiovert 200 inverted light microscope (Carl Zeiss South East Asia, Singapore). Capillary length from representative fields was quantified by ImageJ (National Institutes of Health, USA).

### **Apoptosis assay**

To investigate the contribution of GRP78 to ISM-induced EC apoptosis, HUVECs were pre-transfected by GRP78 siRNAs for 48 h. Control HUVECs

were transfected by scramble siRNA. Cells ( $2 \times 10^4$ ) were then seeded into 96-well plate. After starving in 2% FBS basal medium for 3 h, HUVECs were treated with 1  $\mu$ M rISM and 15 ng/ml VEGF for 24 h. Apoptosis was detected by a Cell Death ELISA kit (Roche, Roche Diagnostics Asia Pacific, Singapore)

### **Cell attachment assay**

Ninety-six well plates were coated with 1  $\mu$ M rISM at 4°C overnight. Nonspecific binding sites were blocked with 1% BSA for 2 h at 37°C. HUVECs were pre-transfected by GRP78 siRNAs or scramble control siRNA for 48 h before they were plated into each well ( $2 \times 10^4$  cells/well) and allowed to attach for 1 h at 37°C. Attached cells were fixed by 10% formalin and stained with 0.2% crystal violet. Absorbed crystal violet was extracted by 10% acetic acid and quantified by measuring the absorbance of eluted dye at 595 nm with a microplate reader (Bio-Rad, Hercules, CA, USA).

### **Internalized ISM triton partitioning**

Triton-insoluble and -soluble fractions of HUVEC lysate were prepared as previously described<sup>2</sup>. HUVECs were treated with 1  $\mu$ M rISM for 24 h. After thoroughly washed by acidic PBS (pH3.5) to remove cell surface associated ISM, the cells were lysed in 1 ml of 1% Triton X-100 in 2-(N-morpholino)ethanesulfonic acid (MES)-buffered saline (25 mM MES, 0.15 M NaCl, 1 $\times$ protease inhibitor cocktail, pH 6.5) (Sigma, St. Louis, MO, USA) for

30 min on ice. Cell extracts were homogenized by a tight-fitting Dounce homogenizer (Wheaton, Millville, NJ, USA) and adjusted to a final density of 40% by adding OptiPrep density gradient Medium (Sigma). Samples were transferred into a centrifuge tube and overlaid with discontinuous 30% and 5% OptiPrep density gradient media. Samples were then centrifuged at 39,000 rpm for 18 h. Fractions were collected and analyzed by WB with antibodies against ISM (his-probe), integrin  $\beta$ 5 subunit and GRP78. Caveolin-1 and clathrin heavy chain (CHC) were used as markers for lipid-raft and non lipid-raft fraction.

#### **ADP colorimetric assay**

The ADP concentrations in whole cell lysate, mitochondrial and cytosolic (without mitochondria) fractions in HUVECs with indicated treatment of 1 $\mu$ M rISM or 10  $\mu$ M pan-caspase inhibitor - Z-VAD-fmk (Millipore, Billerica, MA, USA) for 3 h were analyzed using the ADP colorimetric assay kit (BioVision, Milpitas, CA, USA).

#### **Determination of ISM-treated HUVECs morphology under caspase inhibitor**

HUVECs were starved for 3 h in 2% FBS media and then incubated with 2% FBS medium containing 15 ng/ml VEGF. HUVECs were either received no additional treatment as the control or treated by 1 $\mu$ M rISM with or without 10



µM pan-caspase inhibitor - Z-VAD-fmk for 24 h. Cells were then incubated with MitoTracker for 30 min and washed by acidic PBS (pH 3.5) to remove surface bound rISM. Internalized rISM was detected by IF staining using anti-his antibody. Nuclei were stained by DAPI. Images were collected by Zeiss LSM-510Meta confocal microscope.

### RNAi gene knockdown

To knockdown human GRP78, two synthetic siRNA were used (Integrated DNA Technologies, Singapore): siRNA1-GRP78 (5'-GGAGCGCAUUGAUACUAGAUU-3')<sup>3</sup> and siRNA2-GRP78 (5'-AGACGCUGGAACUAUUGCUUU-3')<sup>4</sup>. A random scramble siRNA (5'-AAUUCUCCGAACGUGUCACGUUU-3') was used as the control<sup>3</sup>.

### References

1. Kumar S, Sharghi-Namini S, Rao N, Ge RW. ADAMTS5 Functions as an Anti-Angiogenic and Anti-Tumorigenic Protein Independent of Its Proteoglycanase Activity. *Am J Pathol* 2012; **181**(3): 1056-1068.
2. Wickstrom SA, Alitalo K, Keski-Oja J. Endostatin associates with lipid rafts and induces reorganization of the actin cytoskeleton via down-regulation of RhoA activity. *J Biol Chem* 2003; **278**(39): 37895-901.
3. Tsutsumi S, Namba T, Tanaka KI, Arai Y, Ishihara T, Aburaya M *et al.* Celecoxib upregulates endoplasmic reticulum chaperones that inhibit celecoxib-induced apoptosis in human gastric cells. *Oncogene* 2006; **25**(7): 1018-29.
4. Su R, Li Z, Li H, Song H, Bao C, Wei J *et al.* Grp78 promotes the invasion of hepatocellular carcinoma. *BMC cancer* 2010; **10**: 20.

a

## Protein View

Match to: **gi|4758012** Score: 205 Expect: 4.1e-016  
**clathrin heavy chain 1 [Homo sapiens]**

Matched peptides shown in **Bold Red**

1 MAQILPFRQ ENLQAGLRI NPAHGFSTL TMSDFVCI RRVGDAQV  
 51 VIIDNDENP EIRSDIAGS RINDRATYI ALKADTGLI FIDMDSGMK  
 101 ANHTDIDPTF WKHLSLITVA LVZDNVAIHR NMGESGPPK MFDHSDIAG  
 151 QDINRYRTDA KQWMLLITQ SAQGNVVAQ NGLYVSRVY SQPEIGDAAS  
 201 FAFQRMENGA KESTLFCFAV KQAGGKGLMI IKVTFPTGN QFFPKRAVDV  
 251 FFFPQAQNF PWRGIDRKH KVVPLITKYG YHMLYDLETG TCIYMRRLGG  
 301 ETLVYARVAG ATAGLIGQVR KQVLLKRVGK KRIPLIYIH VLQSRGALLES  
 351 NAVVSNLGA KSLFARKFNA LFAQGYSLSA AVVAANAFKQ LIRTFPTQIIR  
 401 PQSVFAQFQG TSPLLQYFQI LLQOQLMRY ESELKRPVL QQGRQLLEK  
 451 WLKEDKLECS KEGGLVRSV DPTLALSVLV RANVNVVQI CFAETQGVOK  
 501 TLVYARVAGV TWMLPILRN VNRISFQSG QFQMLVQIE EPLADITQIV  
 551 DFFVFKVYDQ QCTALRHLI KNRSPRQGI QTRLEMMN MAPVDAVLI  
 601 QRMFTYHR ANIQAUCKA GLIQKALEHF TDLYDKRAV WHNHLNFKP  
 651 LVNYFGSLVE EDSLECLRAM LSNANRQLQ ICQVQARVH EQLSTQSLIE  
 701 LFESFSEFEG LFYFLGSIVN FQDQDVNFK YIQAACTQO IKREVERICRE  
 751 SNCYDPERVK NFKLEAKLTD QPLILVNCR FDFVHLVLI LVYNNLQYVI  
 801 EIVQVNFNS RLFVYVGLL DVDCSEVTK NLLVYVRSQ STDELVAEVE  
 851 KRNRLKLLP WLEARINHCQ EEPATHNALA KVIIDNNP RFLRENYYI  
 901 DSRVGVYRCE ERDHLACVA YERQCELEL DMVNCSELE RLSLRYLVR  
 951 HDREAVWAGV LKSNFFRFL LQVYQALAS DQEDREVVV TWRAFPTALD  
 1001 PHEILLELE IVZDNRVFR HRHQLKELL YATKADYTH MEYLNRLIYV  
 1051 DAFDIANAI SHELFEAFA EFKRFPVNS AVQVLEHIS NLRARFEAAI  
 1101 HNRPAVWAGV LAKAGLQRH VEAIAISYIE ADQFSYEVH VQANSTGDM  
 1151 KRLVYVLSGA HRAARQVYV TRILFALAN WLALEKRFI MQRNARLQD  
 1201 VDRICVYRKH YDAALLVNN VDRPRLATL LVHLEGGAA VQGRARHET  
 1251 RFWREYVAC VQREFFLAG MGLHLYVHA DELEELNYI QGGYFELI  
 1301 TMLAALGLE FARKKTELE ALIQEYRQ KMRLEFLRM SRVIVRILK  
 1351 AARQALWAE LVFLYVRYE YGAIITSMH HFDANRQEG FPDITIKVAN  
 1401 VELYVRAIQ YLEHFLHLL ELIYVLEPL DTRAVWVFK KNGLLVQVFK  
 1451 VLRYVGNHN KWRVSLANK FTRFQDQAL RYRITQVDM DRFLAQLRLE  
 1501 KHELLEFRI AAVLFGGRN WQGVLELCE DRLYDQAFQ ABERETLEA  
 1551 KELLQWLFQ EKRQFCFAL FCTGLKDFE VLEVTAMRH LDYAFVYFI  
 1601 QWMEYELIV DILGASLEH RSRQATKYG VYVYVQVLI LTAGVAVAV  
 1651 PQAFYVQYIT APTQVQFQD FQYDM

b

## Protein View

Match to: **gi|16507237** Score: 353 Expect: 6.5e-031  
**heat shock 70kDa protein 5 [Homo sapiens]**

Matched peptides shown in **Bold Red**

1 MKSLVAAML LLSLSARAE EKDKEDGVY VQIDLOTYS CVQVFNQV  
 51 EILANDQNR IPTSVVAFTE EGERALIDAA NGLGTFNEN TVFDAGRLIG  
 101 FTRNDRVQQ DIKFIFPVV FVDRVYDQV DIOGGQTFP ABEISAMVL  
 151 FQSTREAY LGQVTRAVY TWRYVNDQV RQVTEGATQ AGRNMRILH  
 201 EPTAAAIATG LNRGSEENI LFTVGGSTI DVSLITDNG VFEVATNDG  
 251 TLQGGEDFQ RVMSHFIRLY KQRTQVCRK ENRVAQVLR EYERKARLS  
 301 SQRGATEIE SFYEDFSE TLTKAKFEL NMLFSTHNS KMRVLELSD  
 351 LKNGIDIEIV LVQVSTRIK LQCLVRFEN QSEFSGIHN DEAVYGAIV  
 401 QAVYLEDQD TDVYLVQDV FLTGISTYV GNTKLIPIR TVYFRKQDI  
 451 ESTASDQET VLYNVEGER FLTYNNHLS GQVYDLEIV RNDVQLEIV  
 501 FIDVNGILR VTRADGTON KNRITITNDQ NMLTFREIA MVDNRKFAE  
 551 EDKLEKERID TNRLESTAV SLRNIQDKE KRLGLSEED MVDNRKFAE  
 601 KRWLESHQD ADDEIFERRV KLEKIVQPI TRKYVLSAP PFTGERDVAE  
 651 KREL

c

## Protein View

Match to: **gi|4758012** Score: 171 Expect: 9.2e-011  
**clathrin heavy chain 1 [Homo sapiens]**

Matched peptides shown in **Bold Red**

1 MAQILPFRQ ENLQAGLRI NPAHGFSTL TMSDFVCI RRVGDAQV  
 51 VIIDNDENP EIRSDIAGS RINDRATYI ALKADTGLI FIDMDSGMK  
 101 ANHTDIDPTF WKHLSLITVA LVZDNVAIHR NMGESGPPK MFDHSDIAG  
 151 QDINRYRTDA KQWMLLITQ SAQGNVVAQ NGLYVSRVY SQPEIGDAAS  
 201 FAFQRMENGA KESTLFCFAV KQAGGKGLMI IKVTFPTGN QFFPKRAVDV  
 251 FFFPQAQNF PWRGIDRKH KVVPLITKYG YHMLYDLETG TCIYMRRLGG  
 301 ETLVYARVAG ATAGLIGQVR KQVLLKRVGK KRIPLIYIH VLQSRGALLES  
 401 PQSVFAQFQG TSPLLQYFQI LLQOQLMRY ESELKRPVL QQGRQLLEK  
 451 WLKEDKLECS KEGGLVRSV DPTLALSVLV RANVNVVQI CFAETQGVOK  
 501 TLVYARVAGV TWMLPILRN VNRISFQSG QFQMLVQIE EPLADITQIV  
 551 DFFVFKVYD QCTALRHLI KNRSPRQGI QTRLEMMN MAPVDAVLI  
 601 QRMFTYHR ANIQAUCKA GLIQKALEHF TDLYDKRAV WHNHLNFKP  
 651 LVNYFGSLVE EDSLECLRAM LSNANRQLQ ICQVQARVH EQLSTQSLIE  
 701 LFESFSEFEG LFYFLGSIVN FQDQDVNFK YIQAACTQO IKREVERICRE  
 751 SNCYDPERVK NFKLEAKLTD QPLILVNCR FDFVHLVLI LVYNNLQYVI  
 801 EIVQVNFNS RLFVYVGLL DVDCSEVTK NLLVYVRSQ STDELVAEVE  
 851 KRNRLKLLP WLEARINHCQ EEPATHNALA KVIIDNNP RFLRENYYI  
 901 DSRVGVYRCE ERDHLACVA YERQCELEL DMVNCSELE RLSLRYLVR  
 951 HDREAVWAGV LKSNFFRFL LQVYQALAS DQEDREVVV TWRAFPTALD  
 1001 PHEILLELE IVZDNRVFR HRHQLKELL YATKADYTH MEYLNRLIYV  
 1051 DAFDIANAI SHELFEAFA EFKRFPVNS AVQVLEHIS NLRARFEAAI  
 1101 HNRPAVWAGV LAKAGLQRH VEAIAISYIE ADQFSYEVH VQANSTGDM  
 1151 KRLVYVLSGA HRAARQVYV TRILFALAN WLALEKRFI MQRNARLQD  
 1201 VDRICVYRKH YDAALLVNN VDRPRLATL LVHLEGGAA VQGRARHET  
 1251 RFWREYVAC VQREFFLAG MGLHLYVHA DELEELNYI QGGYFELI  
 1301 TMLAALGLE FARKKTELE ALIQEYRQ KMRLEFLRM SRVIVRILK  
 1351 AARQALWAE LVFLYVRYE YGAIITSMH HFDANRQEG FPDITIKVAN  
 1401 VELYVRAIQ YLEHFLHLL ELIYVLEPL DTRAVWVFK KNGLLVQVFK  
 1451 VLRYVGNHN KWRVSLANK FTRFQDQAL RYRITQVDM DRFLAQLRLE  
 1501 KHELLEFRI AAVLFGGRN WQGVLELCE DRLYDQAFQ ABERETLEA  
 1551 KELLQWLFQ EKRQFCFAL FCTGLKDFE VLEVTAMRH LDYAFVYFI  
 1601 QWMEYELIV DILGASLEH RSRQATKYG VYVYVQVLI LTAGVAVAV  
 1651 PQAFYVQYIT APTQVQFQD FQYDM

d

## Protein View

Match to: **gi|116507237** Score: 233 Expect: 1.1e-018  
**78 kDa glucose-regulated protein [Homo sapiens]**

Matched peptides shown in **Bold Red**

1 MKSLVAAML LLSLSARAE EKDKEDGVY VQIDLOTYS CVQVFNQV  
 51 EILANDQNR IPTSVVAFTE EGERALIDAA NGLGTFNEN TVFDAGRLIG  
 101 FTRNDRVQQ DIKFIFPVV FVDRVYDQV DIOGGQTFP ABEISAMVL  
 151 FQSTREAY LGQVTRAVY TWRYVNDQV RQVTEGATQ AGRNMRILH  
 201 EPTAAAIATG LNRGSEENI LFTVGGSTI DVSLITDNG VFEVATNDG  
 251 TLQGGEDFQ RVMSHFIRLY KQRTQVCRK ENRVAQVLR EYERKARLS  
 301 SQRGATEIE SFYEDFSE TLTKAKFEL NMLFSTHNS KMRVLELSD  
 351 LKNGIDIEIV LVQVSTRIK LQCLVRFEN QSEFSGIHN DEAVYGAIV  
 401 QAVYLEDQD TDVYLVQDV FLTGISTYV GNTKLIPIR TVYFRKQDI  
 451 ESTASDQET VLYNVEGER FLTYNNHLS GQVYDLEIV RNDVQLEIV  
 501 FIDVNGILR VTRADGTON KNRITITNDQ NMLTFREIA MVDNRKFAE  
 551 EDKLEKERID TNRLESTAV SLRNIQDKE KRLGLSEED MVDNRKFAE  
 601 KRWLESHQD ADDEIFERRV KLEKIVQPI TRKYVLSAP PFTGERDVAE  
 651 KREL

e

## Protein View

Match to: **gi|187608602** Score: 491 Expect: 9.2e-043  
**isthmin-1 precursor [Mus musculus]**

Matched peptides shown in **Bold Red**

1 MYKLAARELL LLELLITLM ITVLRGSGAS SRQDAAGNN NMLKSDSIS  
 51 ETSFLPKRAE FEEGVVHQP FRRQRFPTF QPSLGRQGP RSELLDLPNF  
 101 PDLKADING QNRIQVITIE VYDGFSEAK KQDRKADPTI MSLRPAQWRA  
 151 WQSLSLAR FKEGQKQY DATEDSDFL SVLRQWRDPA FQNRKFEETE  
 201 QKRTKTEGE GSNLVAWVCE VYQVQNRK FTRQCFACIA FSKTKCDENR  
 251 CPQEDYFRI AAYEYSLAG SEEFNATKLF EYDMDSSEW MSCKSEFLKK  
 301 YQNRVINDLP SFCQSYTPE AYSTADIFDR KKKDRFRKD ASQCKKLEL  
 351 FELDVDNGLR IMDFDRGTON KNRITITNDQ NMLTFREIA MVDNRKFAE  
 401 EDKLEKERID TNRLESTAV SLRNIQDKE KRLGLSEED MVDNRKFAE  
 451 KRWLESHQD ADDEIFERRV KLEKIVQPI TRKYVLSAP PFTGERDVAE  
 51 AREY

f

## Protein View

Match to: **gi|156071459** Score: 96 Expect: 5.3e-005  
**ADP/ATP translocase 2 [Homo sapiens]**

Matched peptides shown in **Bold Red**

1 MTDVAVFRK DFLAGQVAAA IKTVAPIE RUKLLIQVH ASQKITADQD  
 51 YKGIIDCVYR IFEQGVQLSE WAGLAVNIVR YFTGALNFA FKRDKYVIGL  
 101 QGVDRKQTVH LYFAGNLAS KQAGKATLFC YPLDFAPTR LAADVQAGAA  
 151 EREERGLQDC LKVIKTSQDI KQLYQVFNYS VQGIITIPAA YFQITVDYI  
 201 MLDQFQTHI VYGNMIAQTV TAVAYVYDF TDYVRNDRM QQRKQASDII  
 251 VTGLDQNRK LADQGGKAF FVQASNVLR QSGAVYLVL YDEIKKPT

g

## Protein View

Match to: **gi|156071462** Score: 89 Expect: 0.0003  
**ADP/ATP translocase 3 [Homo sapiens]**

Matched peptides shown in **Bold Red**

1 MTEQALFAR DFLAGQVAAA IKTVAPIE RUKLLIQVH ASQKITADQD  
 51 YKGIIDCVYR IFEQGVQLSE WAGLAVNIVR YFTGALNFA FKRDKYVIGL  
 101 QGVDRKQTVH LYFAGNLAS KQAGKATLFC YPLDFAPTR LAADVQAGAA  
 151 EREERGLQDC LKVIKTSQDI KQLYQVFNYS VQGIITIPAA YFQITVDYI  
 201 MLDQFQTHI VYGNMIAQTV TAVAYVYDF TDYVRNDRM QQRKQASDII  
 251 VTGLDQNRK IFEQGGKAF FVQASNVLR QSGAVYLVL YDEIKKPT

**Fig. S2**

**a**

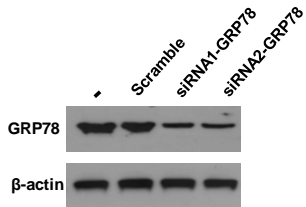

**b**

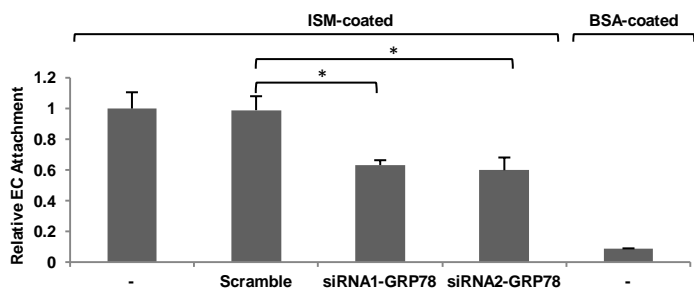

**c**

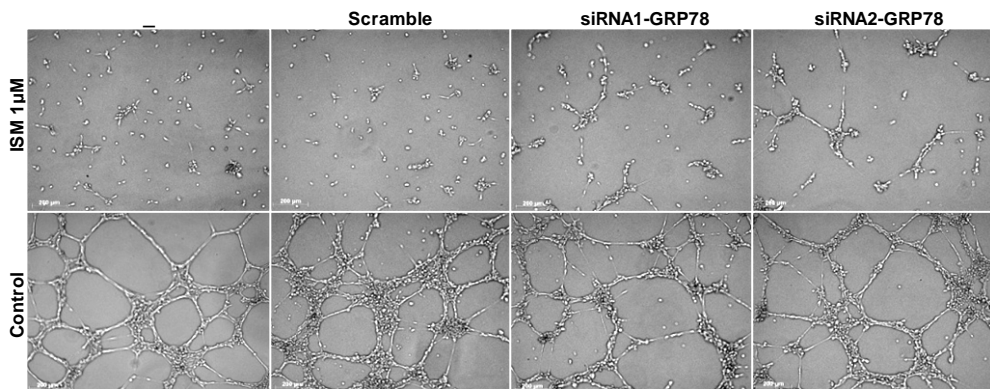

**d**

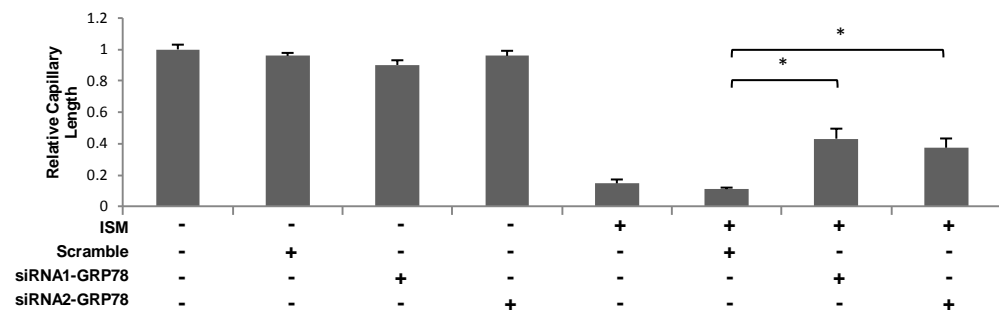

**e**

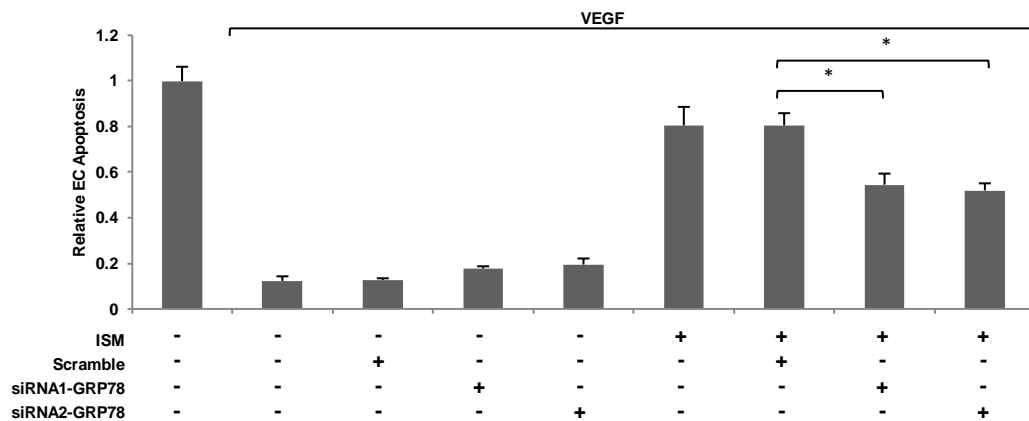

**Fig. S3**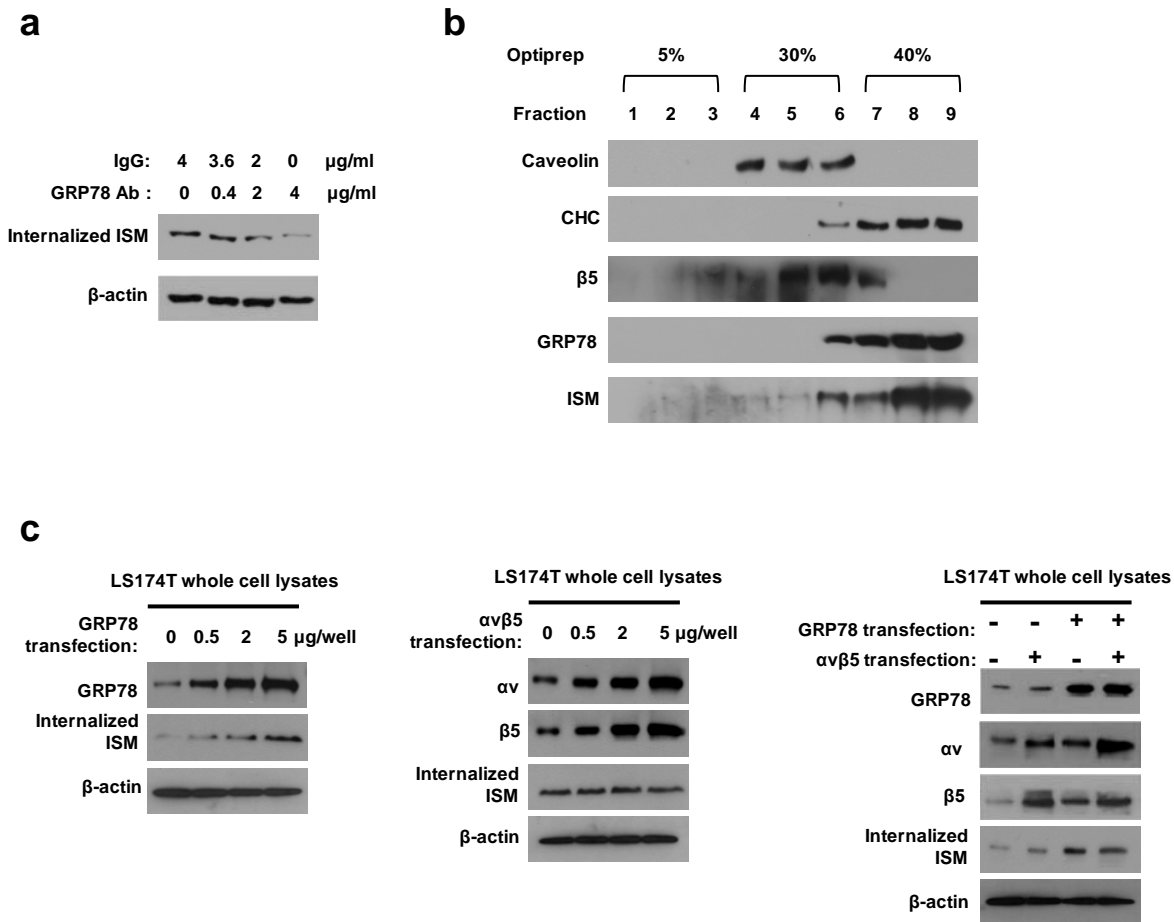

**Fig. S4**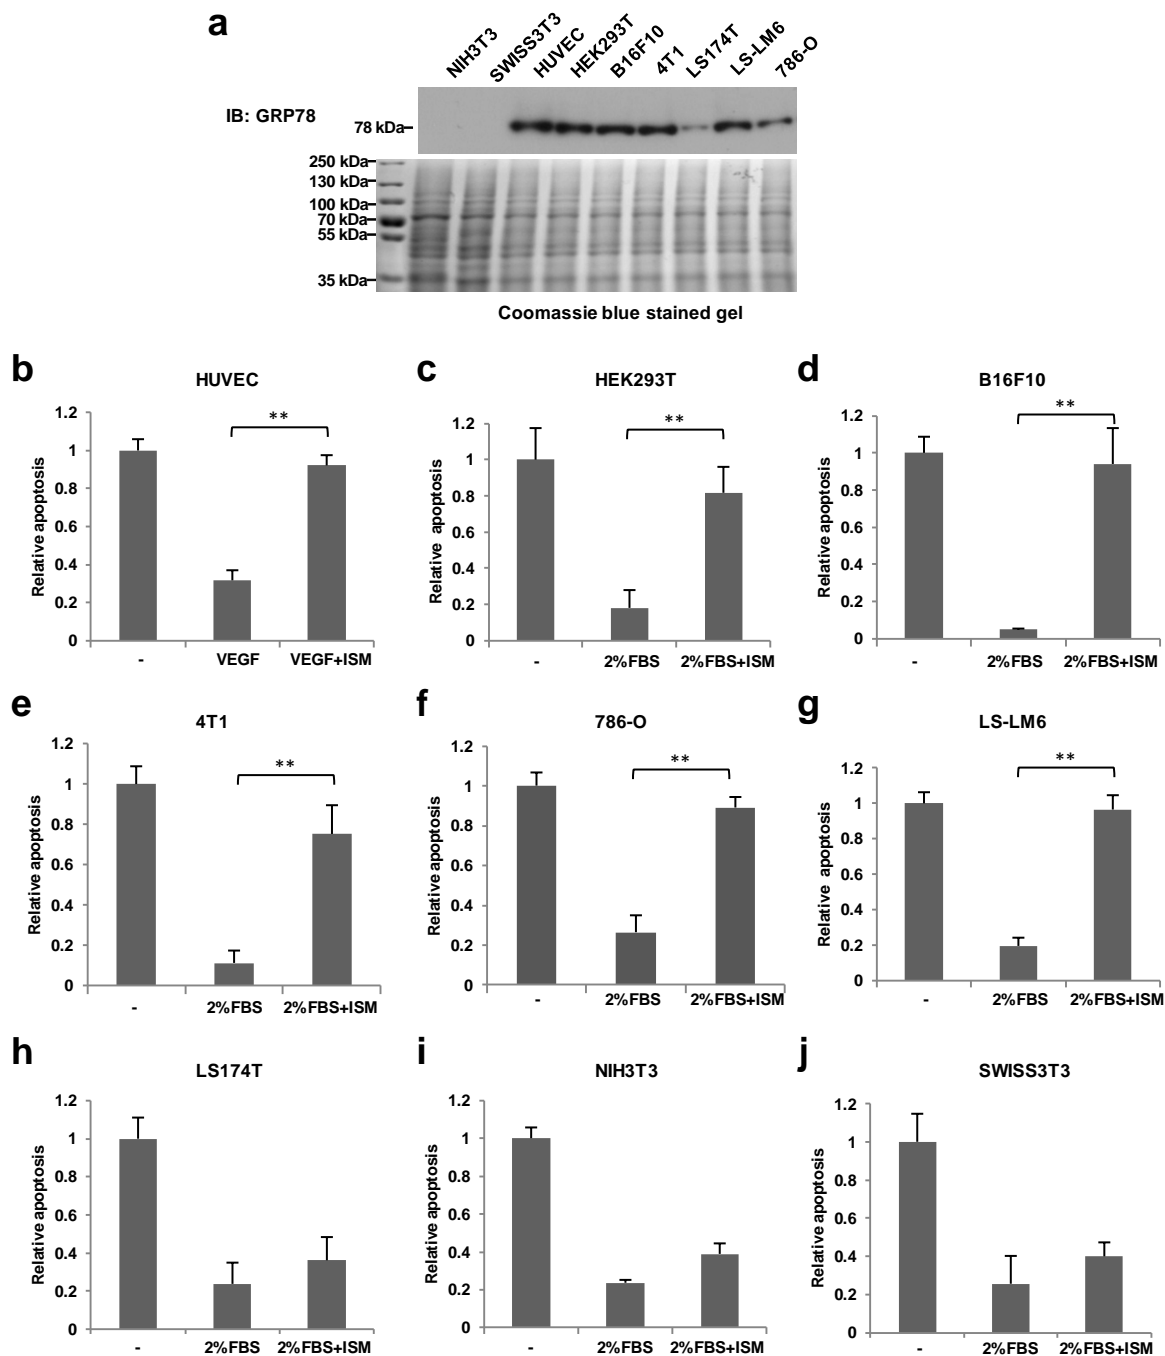

**Fig. S5**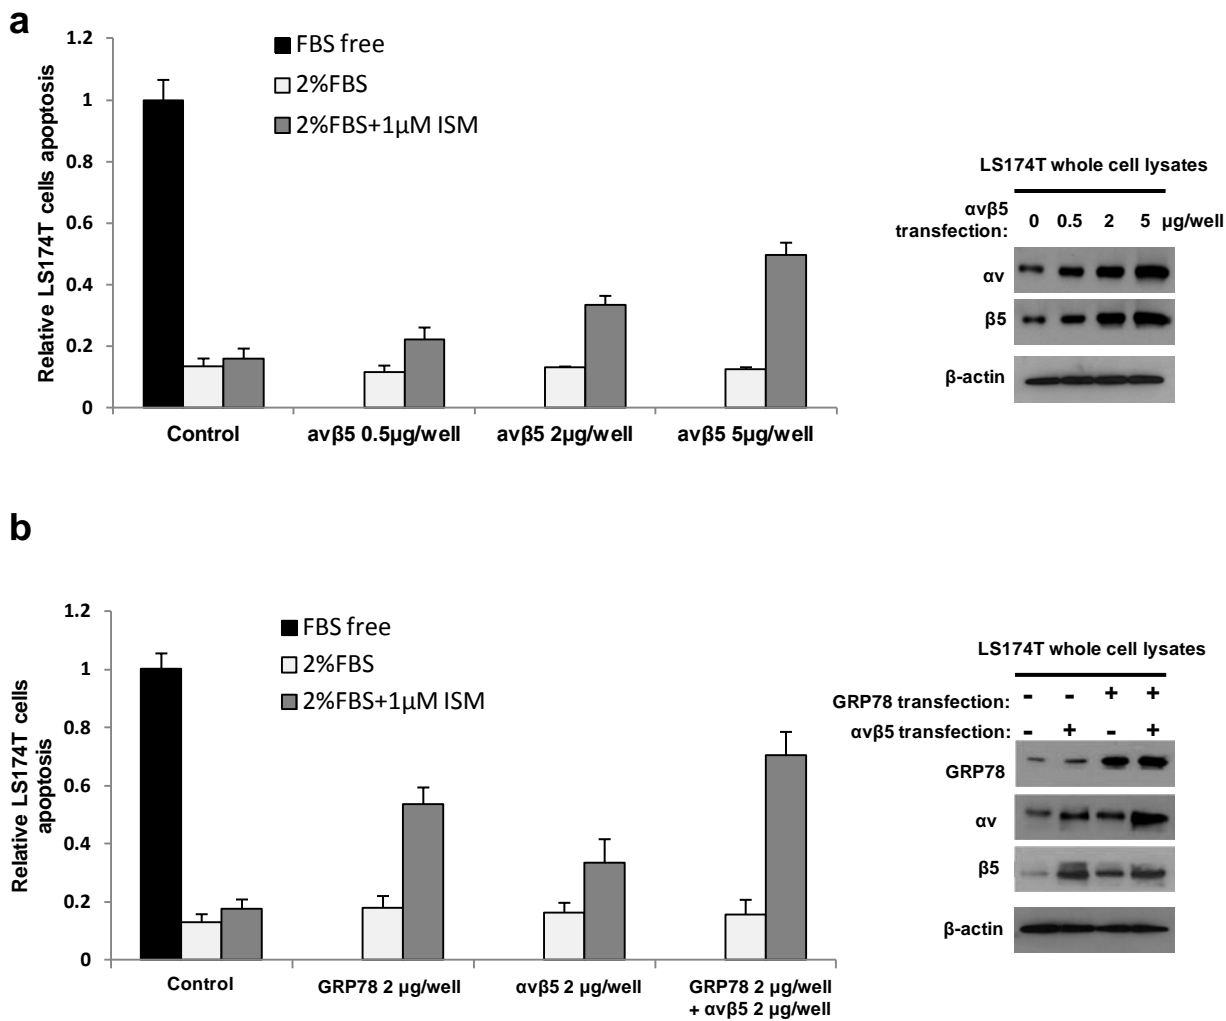

**Fig. S6**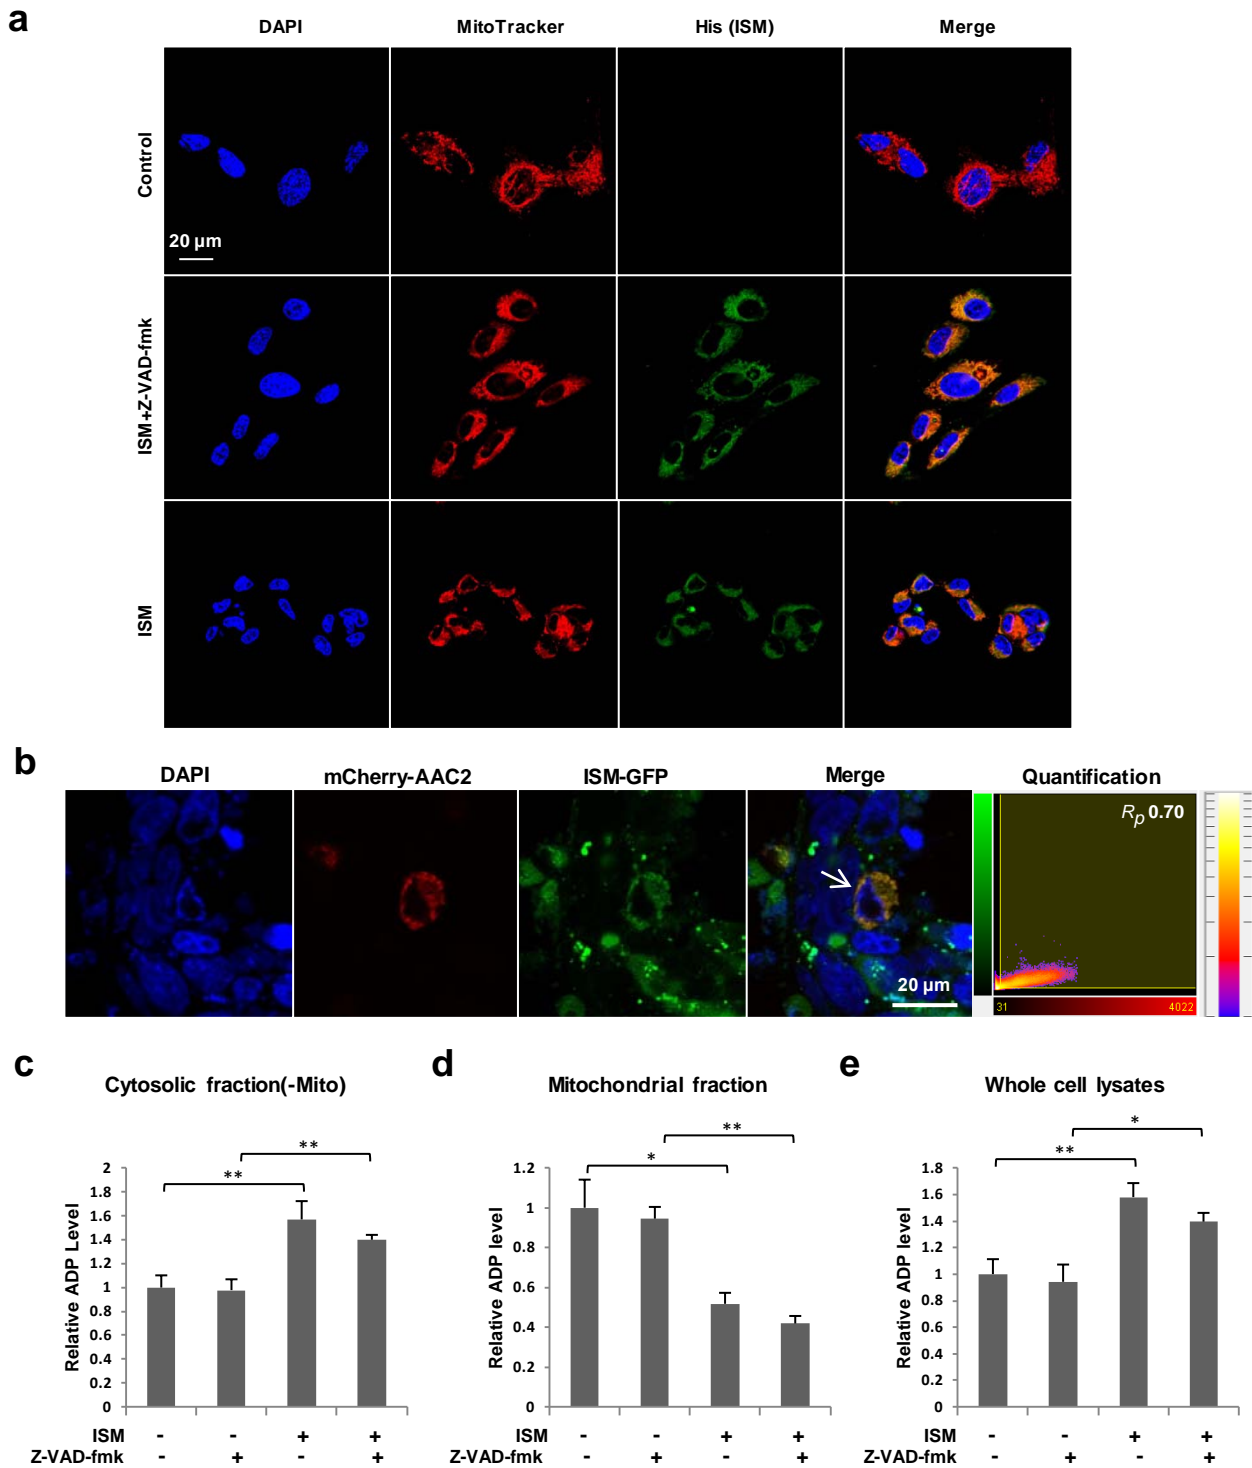

Fig. S7

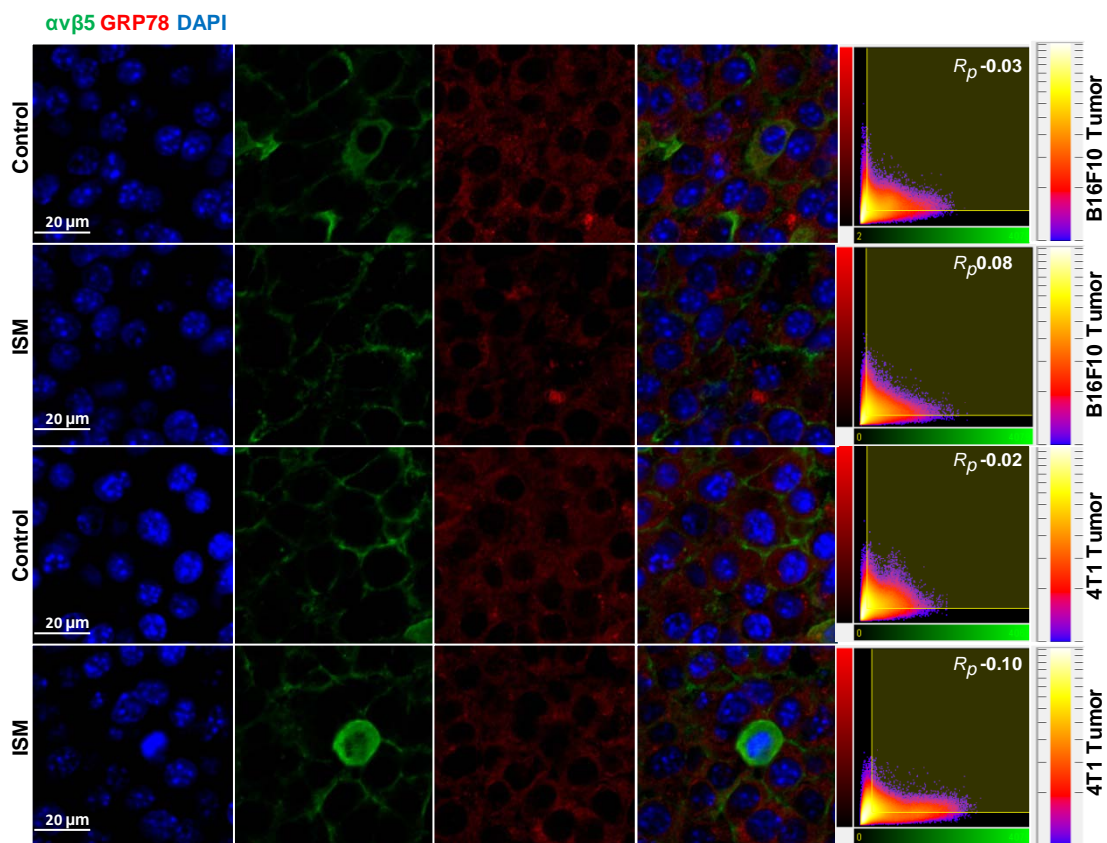



**Fig.S8**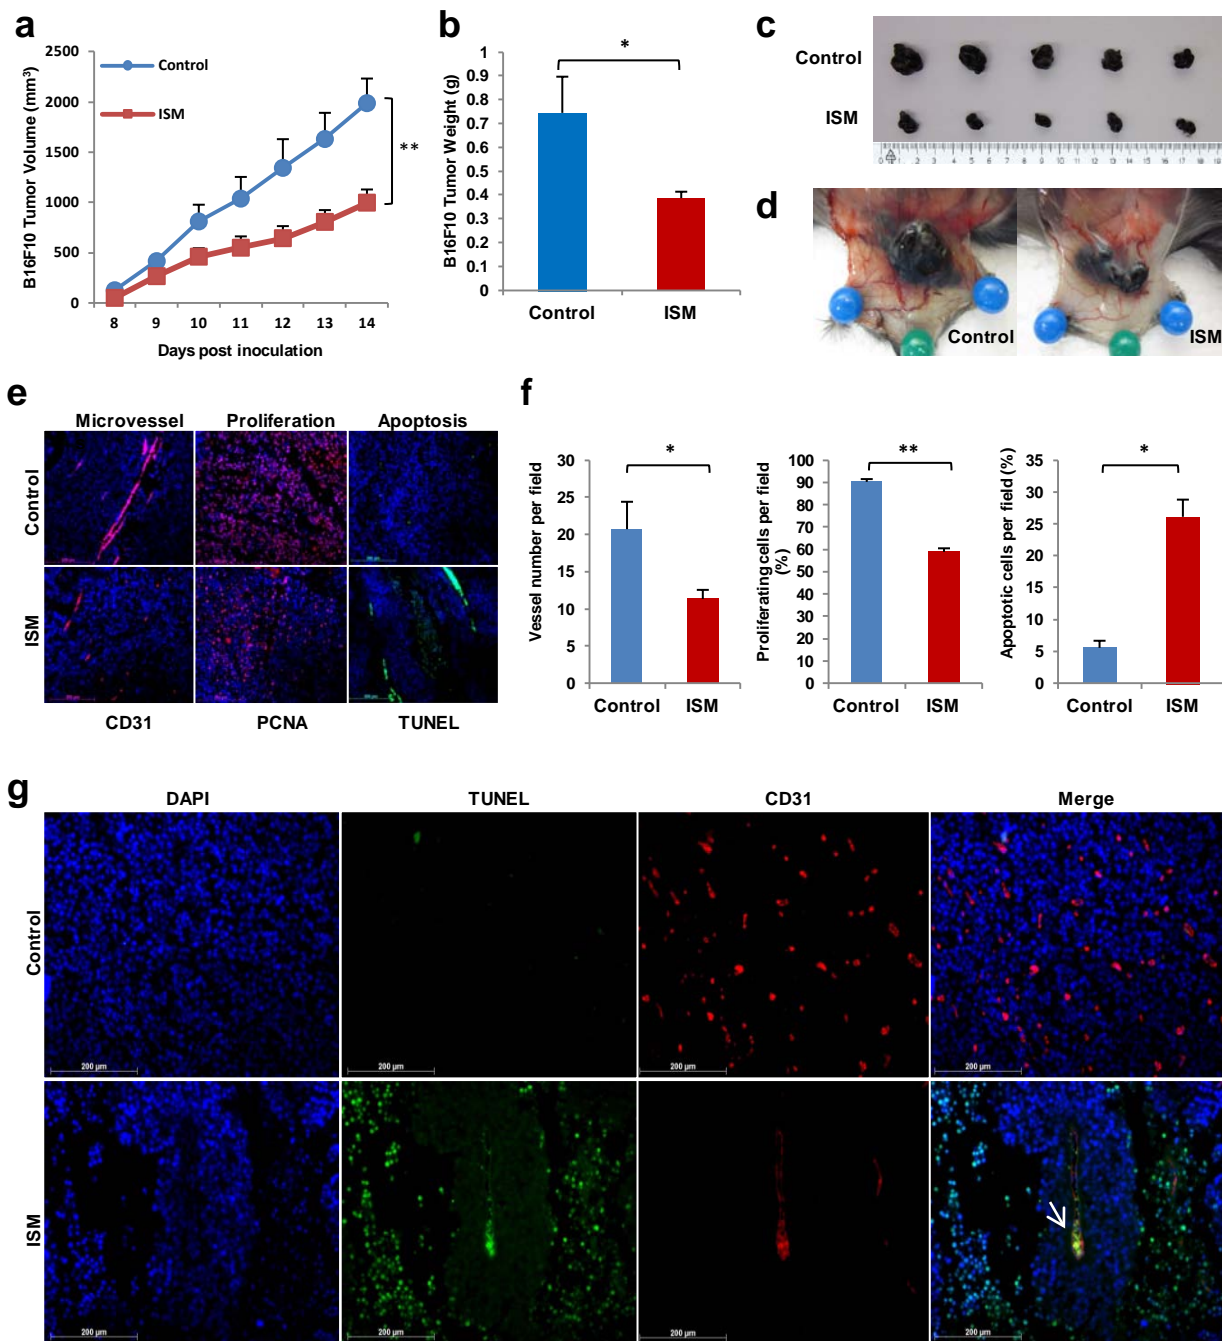

Supplement: cdd20143x1.pdf [file cdd20143x1.pdf]
